# Supplementary material for: DNA methylation and gene expression profiling reveal potential association of retinol metabolism related genes with hepatocellular carcinoma development
Source: PeerJ journal article supplement (doi:10.7717/peerj.17916), 2024-08-23

A

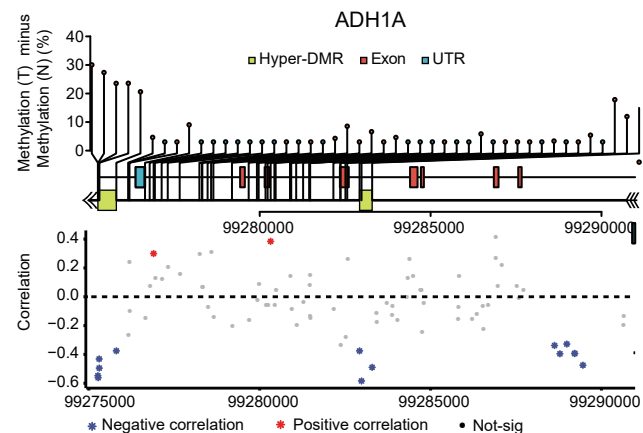

B

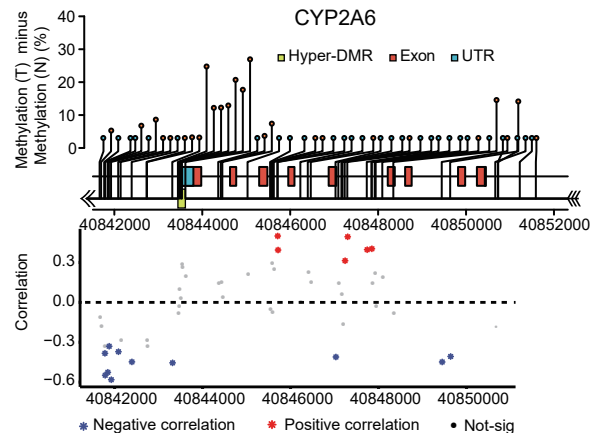

C

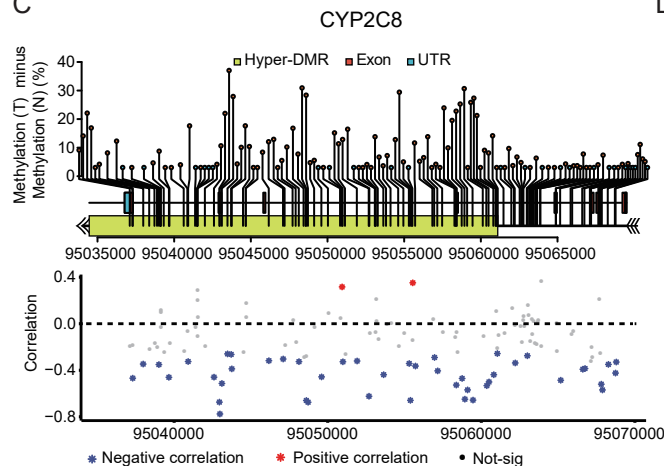

D

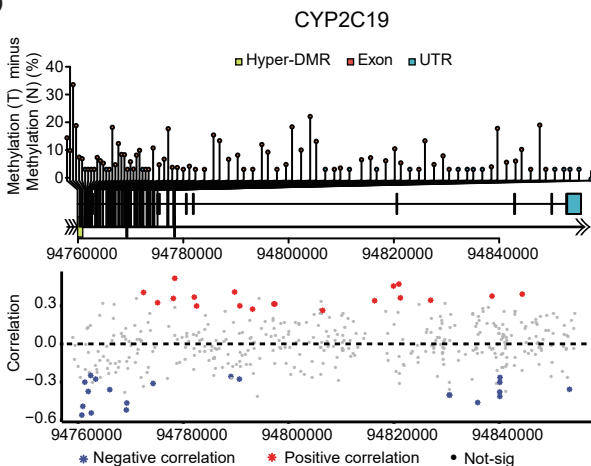

Supplement: Supplementary_Figure_3_01.pdf [file Supplementary_Figure_3_01.pdf]
